# Supplementary material for: Adrenal hemorrhage in newborn: how, when and why- from case report to literature review
Source: PubMed Central journal article supplement (PMC6507044; doi:10.1186/s13052-019-0651-9), 2019-05-08
Supplement: 13052_2019_651_MOESM1_ESM.pdf [file 13052_2019_651_MOESM1_ESM.pdf]

Picture 1. Patient Timeline

Male infant was born at term by spontaneous vaginal delivery following an uneventful pregnancy. Apgar score was respectively 8 and 9 at minutes 1 and 5. His birth weight was 3350 g (AGA). Vitamin K 1mg IM was given duly at birth. There was no evidence of trauma. Twenty-four hours after delivery the neonate was hyporeactive and drowsy,

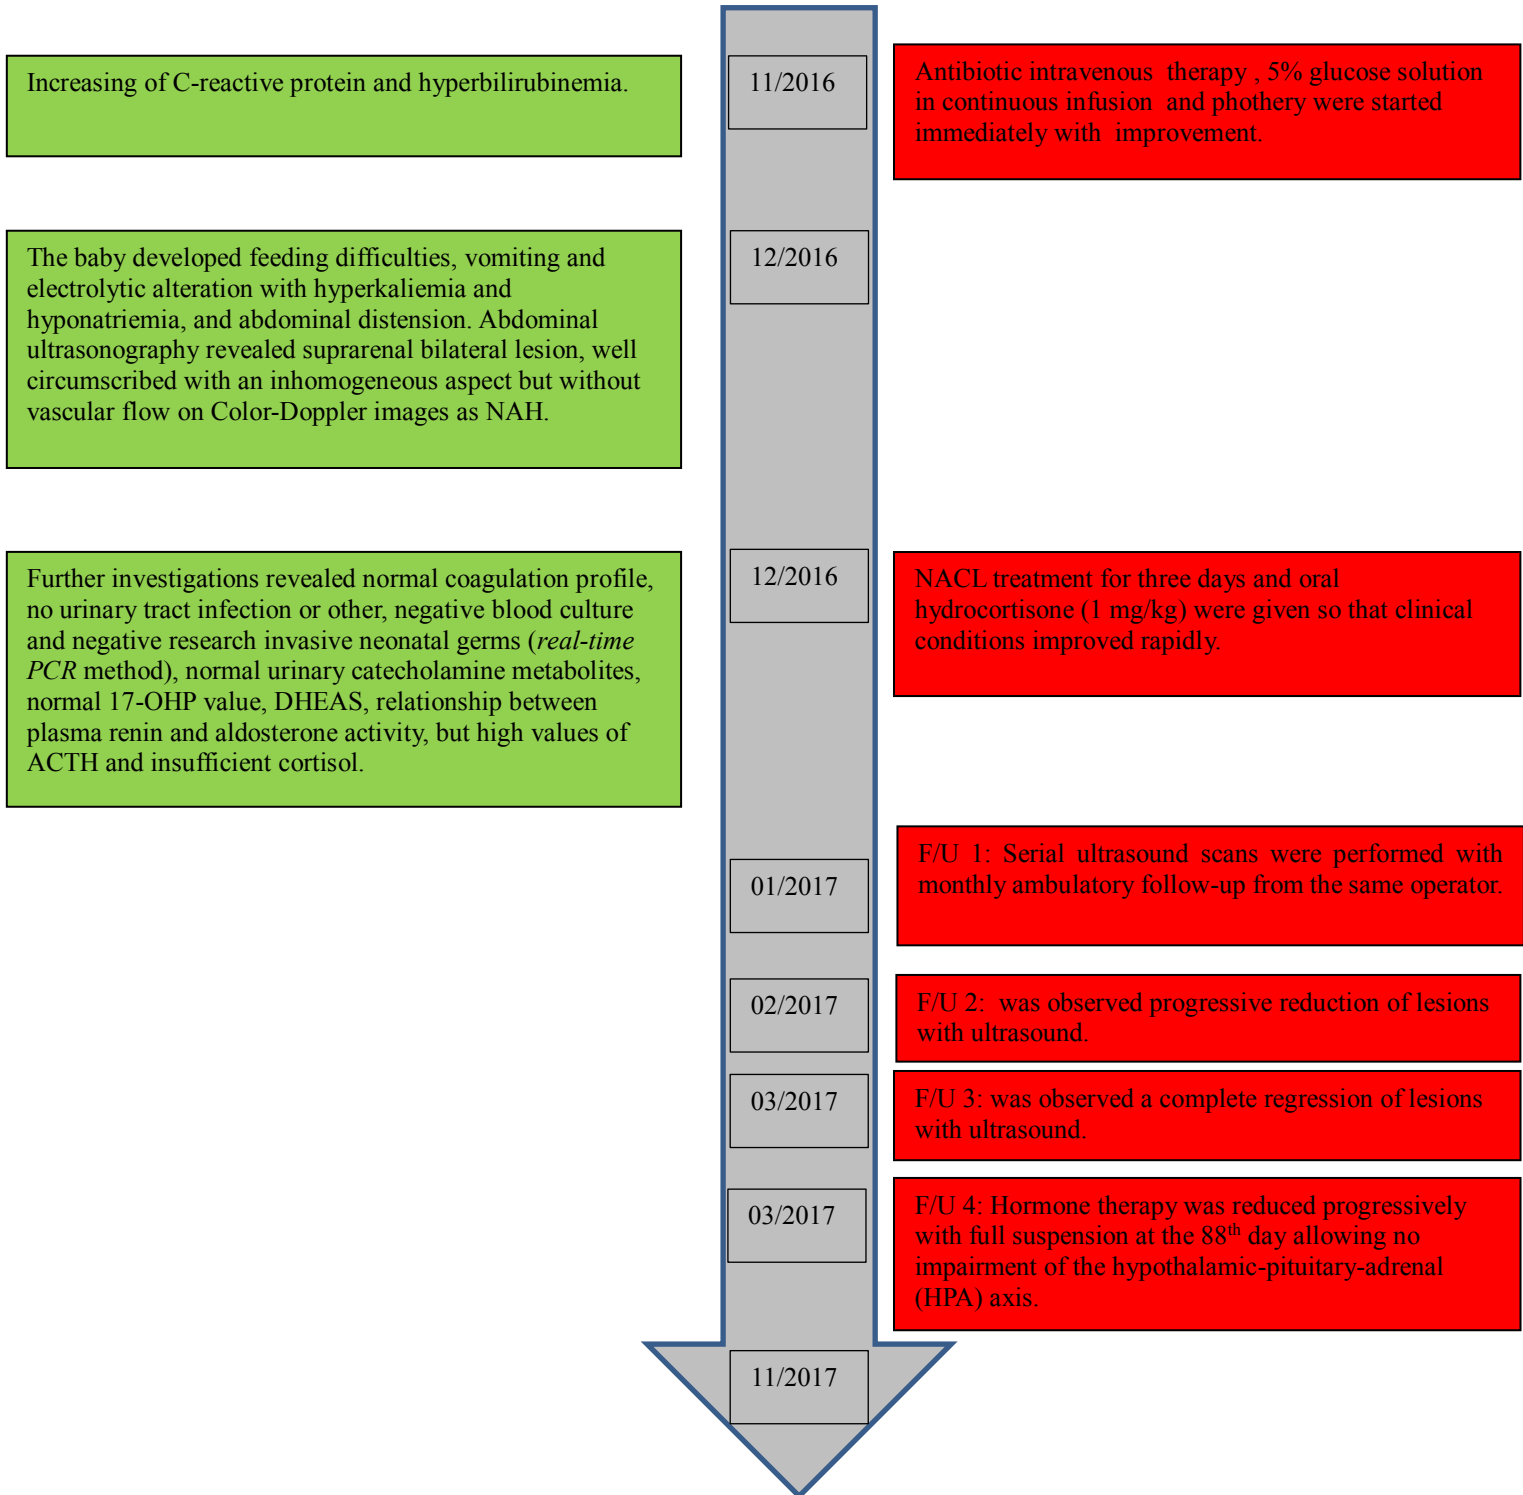

Clinical and ultrasound F/U with good auxological growth when the baby's year old. NAH should be suspected even in the absence of important risk factors. Serial ultrasound monitoring is the most reliable method of choice during conservative management. Furthermore, the correct knowledge of the ultrasound patterns allows the safety in the differential diagnosis with other adrenal diseases.

Abbreviations:: AGA(Appropriate for Gestational Age), NAH (neonatal adrenal hemorrhage), F/U (follow up).
